# Supplementary material for: Different pretreatment methods combined with subsequent activation to convert waste eucalyptus bark into porous carbon electrode materials for supercapacitors
Source: Royal Society of Chemistry journal article supplement (doi:10.1039/d2nj06060d), 2023-01-01
Supplement: d2nj06060d1.pdf [file d2nj06060d1.pdf]

## Supplementary data

# Different pretreatment methods combined with subsequent activation to convert waste eucalyptus bark into porous carbon electrode materials for supercapacitors

Kui Li <sup>a, b</sup>, Zheng Liu <sup>\*, a, b</sup>, Xiangmeng Ma <sup>a, b</sup>, Qingge Feng <sup>a, b</sup>, Dongbo Wang <sup>a, b</sup>, Dachao Ma <sup>a, b</sup>

<sup>a</sup> School of Resources, Environment and Materials, Guangxi University, Nanning 530004, Guangxi, China.

<sup>b</sup> Key Laboratory of Environmental Protection (Guangxi University), Education Department of Guangxi Zhuang Autonomous Region, Guangxi Nanning 530004, China.

\* Corresponding author.

E-mail addresses: zhengl99@gxu.edu.cn (Zheng Liu).

### Electrochemical measurement methods

The electrochemical performance of electrode was firstly investigated in a three-electrode system using 6M KOH as the electrolyte. BPC, acetylene black and polytetrafluoroethylene binder were mixed together to give a weight ratio of 80:15:5 in ethanol, and formed slurry that was pressed onto a nickel foam current collector (1×1 cm<sup>2</sup>) to afford working electrodes. The working electrodes were pressed under 10 MPa for 10 s and then dried under vacuum at 60 °C for 12 h for later tests, the mass loading of the active materials (including BPC, acetylene black and PTFE) in each working electrode determined as ~ 3.0 mg cm<sup>-2</sup>. A platinum foil electrode (1 × 2 cm<sup>2</sup>) and an Hg/HgO electrode were used as the counter electrode and reference electrode in a standard three-electrode setup, respectively. Cyclic voltammetry (CV), galvanostatic charge/discharge (GCD) and electrochemical impedance spectroscopy (EIS) in a frequency range of 100 kHz to 10 mHz at the open circuit potential with 5 mV amplitude were used to study the capacitive performance of the samples. In a three-electrode system, the specific capacitances were calculated from the charge-discharge curves according to the following equation:

$$C = \frac{I\Delta t}{m\Delta V} \quad (\text{S1})$$

Where  $C$  (F g<sup>-1</sup>) is the specific capacitance;  $I$  (A) is the discharge current;  $\Delta t$  (s) is the discharge time;  $m$  (mg) is the mass of the active materials;  $\Delta V$  (V) is the potential window.

The symmetric aqueous supercapacitors in 6 M KOH and 1 M Na<sub>2</sub>SO<sub>4</sub> aqueous solution were

assembled in a 2032 stainless steel coin cell using non-woven fabric to separate the two working electrodes with the same size and active material loadings of  $\sim 3.0 \text{ mg cm}^{-2}$  on each working electrode. The symmetric solid-state supercapacitor was built face-to-face by using two same PBPC-600 electrodes, which were immersed into carboxymethylcellulose sodium/sodium sulfate (CMC-Na/ $\text{Na}_2\text{SO}_4$ ) gel electrolyte with a non-woven fabric separator. The CMC-Na/ $\text{Na}_2\text{SO}_4$  gel here was prepared as follows: 3 g CMC-Na powder (viscosity: 1200 mPa s) was dissolved into 50 mL 6 mol  $\text{L}^{-1}$   $\text{Na}_2\text{SO}_4$  solution under stirring at 70 °C until a transparent gel obtained. CV, GCD, EIS in a frequency range of 100 kHz to 10 mHz at the open circuit potential with 5 mV amplitude and 10000 charge-discharge cycles were studied to evaluate the performance of symmetric supercapacitors. For the symmetric supercapacitors, the specific capacitances, specific energy density and specific power density were calculated from the charge-discharge curves according to the following equation:

$$C = \frac{4I\Delta t}{m\Delta V} \quad (\text{S2})$$

$$E = \frac{1}{2} \times \frac{1}{4} \times C\Delta V^2 \quad (\text{S3})$$

$$P = \frac{3600E}{\Delta t} \quad (\text{S4})$$

Where  $C$  ( $\text{F g}^{-1}$ ) is the specific capacitance;  $I$  (A) is the discharge current;  $\Delta t$  (s) is the discharge time;  $m$  (mg) is the mass of the active materials;  $\Delta V$  (V) is the potential window.  $E$  ( $\text{Wh kg}^{-1}$ ) is the average energy density;  $P$  ( $\text{W kg}^{-1}$ ) is the average power density.

## Figures and tables

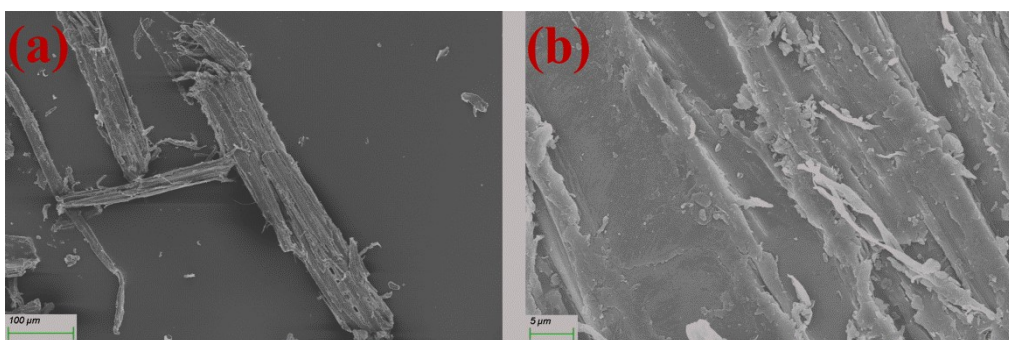

**Fig. S1** SEM images of waste eucalyptus bark.

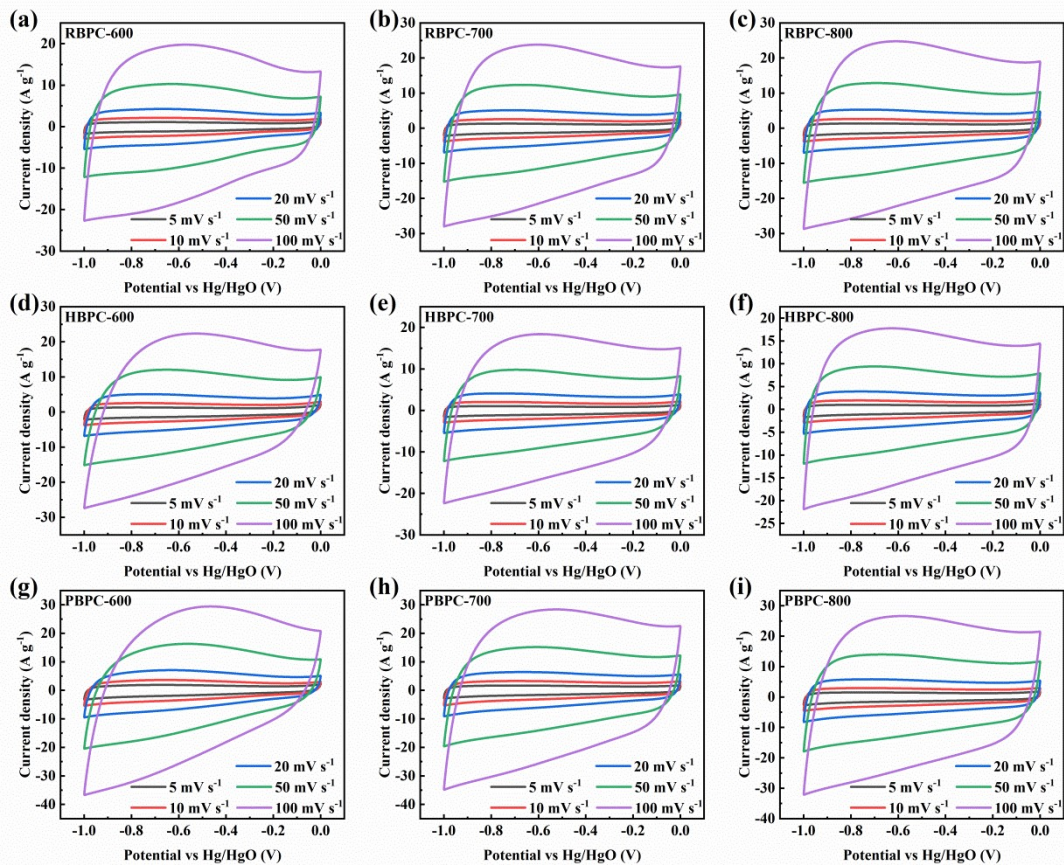

**Fig. S2** CV curves of BPCs in a three-electrode system using 6 M KOH as the electrolyte.

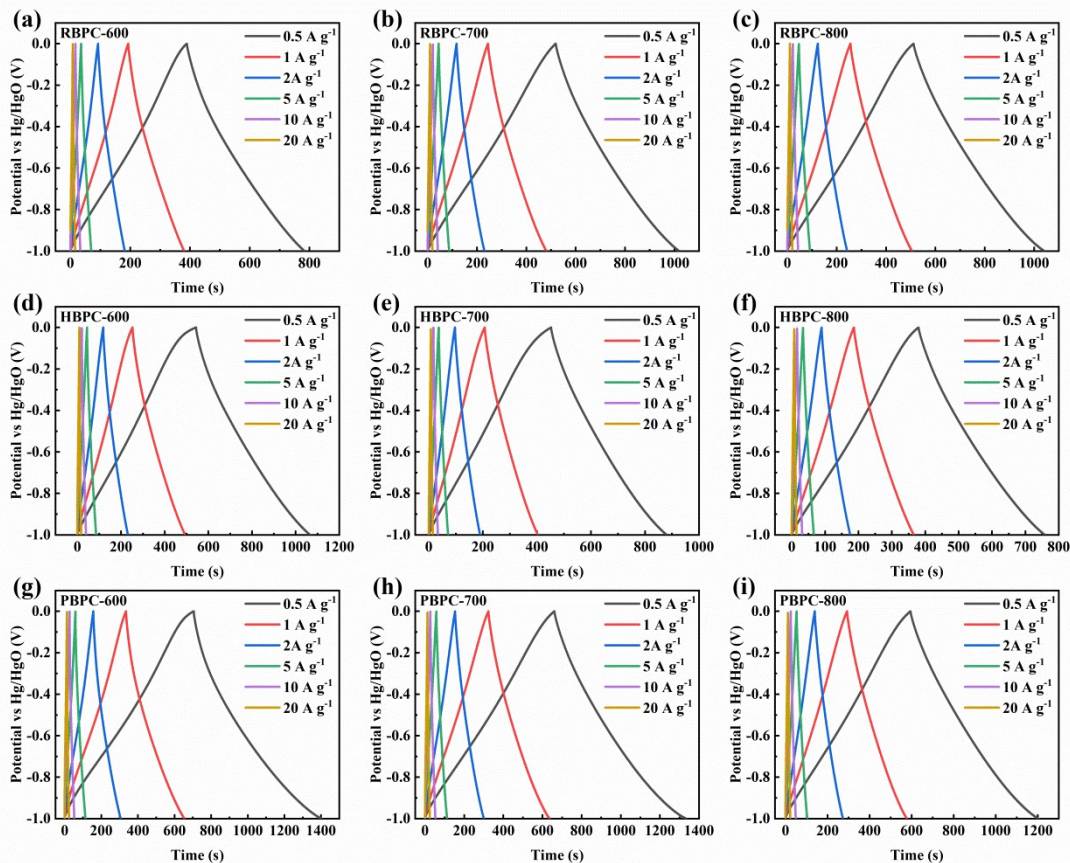

**Fig. S3** GCD curves of BPCs in a three-electrode system using 6 M KOH as the electrolyte.



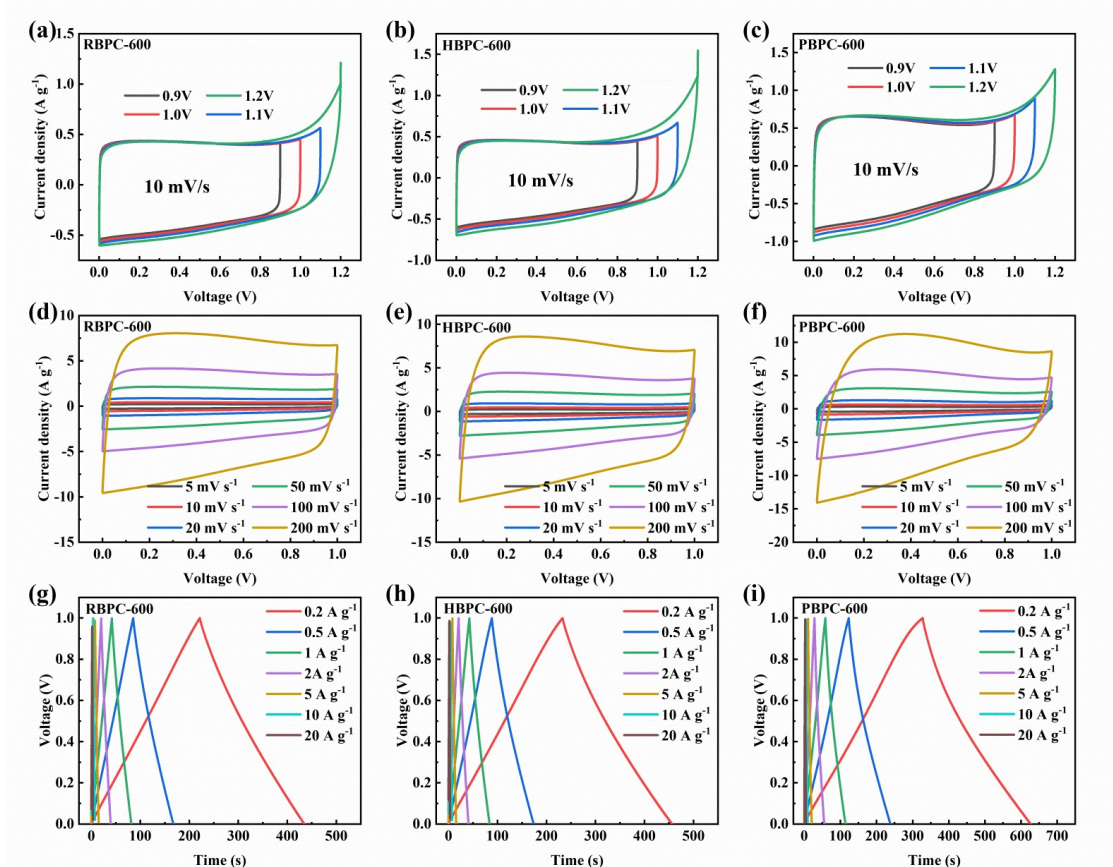

**Fig. S4** Supercapacitive performance in a two-electrode system using 6M KOH as electrolyte: CV curves at a scan rate of  $10 \text{ mV s}^{-1}$  under different operating voltage of (a) RBPC-600, (b) HBPC-600 and (c) PBPC-600; CV curves at different scan rate of (d) RBPC-600, (e) HBPC-600 and (f) PBPC-600; GCD curves under different current density of (g) RBPC-600, (h) HBPC-600 and (i) PBPC-600.

**Table S1** Comparison of the specific capacitance of PBPC-600 electrode with some reported carbon materials.

| Materials                                                | Electrolyte/<br>3E | Specific capacitance<br>( $\text{F g}^{-1}$ ) | Reference |
|----------------------------------------------------------|--------------------|-----------------------------------------------|-----------|
| Hierarchical porous active carbon from fallen leaves     | 6M KOH             | 310.0 ( $0.5 \text{ A g}^{-1}$ )              | 1         |
| Activated biomass carbon made from bamboo                | 3M KOH             | 293.0 ( $0.5 \text{ A g}^{-1}$ )              | 2         |
| Tea-leaves based nitrogen-doped porous carbon            | 2M KOH             | 296.0 ( $0.5 \text{ A g}^{-1}$ )              | 3         |
| graphene-like activated carbon derived from rice straw   | 3M KOH             | 255.0 ( $0.5 \text{ A g}^{-1}$ )              | 4         |
| Rose-derived 3D carbon nanosheets                        | 6M KOH             | 208.0 ( $0.5 \text{ A g}^{-1}$ )              | 5         |
| Porous carbon derived from lotus seedpod shell           | 3M KOH             | 165.0 ( $0.5 \text{ A g}^{-1}$ )              | 6         |
| Superhydrophilic carbon derived from sweet potato leaves | 6M KOH             | 296.0 ( $0.5 \text{ A g}^{-1}$ )              | 7         |

|                                                                     |        |                                |           |
|---------------------------------------------------------------------|--------|--------------------------------|-----------|
| Porous carbon derived from sorghum stalk                            | 6M KOH | 216.5 (0.5 A g <sup>-1</sup> ) | 8         |
| Crosscutting bamboo-derived porous carbon                           | 6M KOH | 280.0 (0.5 A g <sup>-1</sup> ) | 9         |
| Porous carbon derived from ginkgo leaves                            | 6M KOH | 323.2 (0.5 A g <sup>-1</sup> ) | 10        |
| Biomass porous carbon derived from waste eucalyptus bark (PBPC-600) | 6M KOH | 349.4 (0.5 A g <sup>-1</sup> ) | This work |

**Table S2** Comparison of the energy density of the PBPC-600 based symmetric quasi-solid-state supercapacitor with recently published carbon-based aqueous symmetric supercapacitors.

| Electrode materials                                                 | Electrolyte                                | Max energy density (Wh kg <sup>-1</sup> ) | Reference |
|---------------------------------------------------------------------|--------------------------------------------|-------------------------------------------|-----------|
| Activated carbon synthesized from oil palm kernel shell             | 1 M Na <sub>2</sub> SO <sub>4</sub>        | 7.4 (300.0 W kg <sup>-1</sup> )           | 11        |
| Porous carbon derived from sorghum stalk                            | 0.5 M Na <sub>2</sub> SO <sub>4</sub>      | 9.8 (225.4 W kg <sup>-1</sup> )           | 8         |
| Peanut shells-derived 3D porous carbon                              | PVA/Li <sub>2</sub> SO <sub>4</sub>        | 9.0 (380.0 W kg <sup>-1</sup> )           | 12        |
| High graphitic biomass porous carbon                                | 1 M Na <sub>2</sub> SO <sub>4</sub>        | 14.2 (218.8 W kg <sup>-1</sup> )          | 13        |
| Monolithic carbon sponge                                            | PVA/ KOH                                   | 5.6 (250.0 W kg <sup>-1</sup> )           | 14        |
| Graphitic hierarchical porous carbon nanosheets                     | 1 M Na <sub>2</sub> SO <sub>4</sub>        | 11.7 (80.0 W kg <sup>-1</sup> )           | 15        |
| Honeycomb-like biomass carbon material                              | 1 M Na <sub>2</sub> SO <sub>4</sub>        | 11.1 (20.0 W kg <sup>-1</sup> )           | 16        |
| Tobacco-stem-derived porous carbon                                  | 1 M Na <sub>2</sub> SO <sub>4</sub>        | 7.8 (444.0 W kg <sup>-1</sup> )           | 17        |
| O, N-doped porous carbon derived from bamboo shoots shells          | 1 M Na <sub>2</sub> SO <sub>4</sub>        | 13.2 (546.6 W kg <sup>-1</sup> )          | 18        |
| Biomass porous carbon derived from waste eucalyptus bark (PBPC-600) | CMC-Na/Na <sub>2</sub> SO <sub>4</sub> gel | 15.0 (160.0 W kg <sup>-1</sup> )          | This work |

## References

- 1 Y.-T. Li, Y.-T. Pi, L.-M. Lu, S.-H. Xu and T.-Z. Ren, *J. Power Sources*, 2015, **299**, 519-528.
- 2 G. Zhang, Y. Chen, Y. Chen and H. Guo, *Mater. Res. Bull.*, 2018, **102**, 391-398.
- 3 G. Ma, J. Li, K. Sun, H. Peng, E. Feng and Z. Lei, *J. Solid State Electr.*, 2016, **21**, 525-535.
- 4 K. M. Horax, S. Bao, M. Wang and Y. Li, *Chinese Chem. Lett.*, 2017, **28**, 2290-2294.
- 5 C. Zhao, Y. Huang, C. Zhao, X. Shao and Z. Zhu, *Electroch. Acta*, 2018, **291**, 287-296.
- 6 J. Pu, W. Kong, C. Lu and Z. Wang, *Ionics*, 2014, **21**, 809-816.
- 7 R. Fu, C. Yu, S. Li, J. Yu, Z. Wang, W. Guo, Y. Xie, L. Yang, K. Liu, W. Ren and J. Qiu, *Green Chem.*, 2021, **23**, 3400-3409.
- 8 G. Ma, F. Hua, K. Sun, Z. Zhang, E. Feng, H. Peng and Z. Lei, *RSC Adv*, 2016, **6**, 103508-103516.
- 9 J. Han, Y. Ping, S. Yang, Y. Zhang, L. Qian, J. Li, L. Liu, B. Xiong, P. Fang and C. He, *Diam. Relat. Mater.*, 2020, **109**, 108044.
- 10 Y. Wang, C. Shao, S. Qiu, Y. Zhu, M. Qin, Y. Meng, Y. Wang, H. Chu, Y. Zou, C. Xiang, J.-L. Zeng, Z. Cao, F. Xu and L. Sun, *Diam. Relat. Mater.*, 2019, **98**, 107475.
- 11 I. I. Misnon, N. K. M. Zain and R. Jose, *Waste Biomass Valori.*, 2018, **10**, 1731-1740.
- 12 P. A. Le, V. Q. Le, N. T. Nguyen and T. V. B. Phung, *Appl. Nanosci.*, 2022.

- 13 Y. Tan, Z. Xu, L. He and H. Li, *J. Energy Storage*, 2022, **52**, 104889.
- 14 X. Jing, L. Wang, K. Qu, R. Li, W. Kang, H. Li and S. Xiong, *ACS Appl. Energ. Mater.*, 2021, **4**, 6768-6776.
- 15 P. Li, H. Xie, Y. Liu, J. Wang, Y. Xie, W. Hu, T. Xie, Y. Wang and Y. Zhang, *J. Power Sources*, 2019, **439**, 227096.
- 16 K. Zhao, L. Zhao, W. Zhou, L. Rao, S. Wen, Y. Xiao, B. Cheng and S. Lei, *J. Energy Storage*, 2022, **52**, 104910.
- 17 H. Wang, L. Yang, G. Liu and M. Li, *ChemistrySelect*, 2021, **6**, 532-537.
- 18 J. Han, Q. Li, J. Wang, J. Ye, G. Fu, L. Zhai and Y. Zhu, *J. Mater. Sci.: Mater. El.*, 2018, **29**, 20991-21001.
